# Supplementary material for: Identification of Potential Transcriptional Biomarkers Differently Expressed in Both S. aureus- and E. coli-Induced Sepsis via Integrated Analysis
Source: Hindawi journal article supplement (doi:10.1155/2019/2487921), 2019-04-09
Supplement: f1 [file 2487921.f1.pdf]

**Supplementary Table 1** Primers designed for validation of commonly expressed genes in four dataset by quantitative real-time PCR.

| <b>Primer name</b> | <b>Forward sequence (5'-3')</b> | <b>Reverse sequence (5'-3')</b> | <b>Tm(F/R)</b> | <b>Amplicon size</b> |
|--------------------|---------------------------------|---------------------------------|----------------|----------------------|
| CEACAM1-human      | AACTTTGAAGCCCAGCAAC<br>C        | GCAGGACAGGTTTCATTAC<br>TGC      | 59.3/59.8      | 108                  |
| PFKFB3-human       | AAAGTCCGGAAGCAATGTG<br>C        | ATTGGTGGCATCGAAAACC<br>G        | 59.4/59.5      | 96                   |
| PSTPIP2-human      | CTGAAATCAACACCCTGAA<br>GCG      | CCTGGCCTCTTCTCTTAAA<br>CTC      | 60.1/58.1      | 107                  |
| SOCS3-human        | AGTACGATGCCCCGCTTTAA<br>G       | TTGGCTTCTTGTGCTTGTG<br>C        | 60.5/59.9      | 107                  |
| IL18RAP-human      | AGTGAGAACCATTGTGGGA<br>GAC      | AGCCAAATCGTGCTTTGCA<br>G        | 60.0/60.0      | 119                  |
| LILRA5-human       | AGGTGTCAGATGTGTCTCT<br>GC       | TTTTTCAGCCCTGGAGATG<br>C        | 59.7/58.5      | 84                   |
| TNFAIP6-human      | AAGCACGGTCTGGCAAATA<br>C        | ATGGCCGCCTTCAAATTCA<br>C        | 58.8/59.5      | 71                   |
| GK-human           | ACTTCGTCCCAGCATTTCG             | TCCACAGATTATCCCTCTTG<br>CG      | 58.8/59.9      | 71                   |
| RPS18-human        | ATCCTCAGTGAGTTCTCCCG            | CTTTGCCATCACTGCCATTA            | 58.5/56.4      | 106                  |

Note: CEACAM1: carcinoembryonic antigen related cell adhesion molecule 1; GK: glycerol kinase; PFKFB3: 6-phosphofructo-2-kinase/fructose-2, 6-biphosphatase 3; TNFAIP6: TNF alpha induced protein 6; IL18RAP: interleukin 18 receptor accessory protein; LILRA5: leukocyte immunoglobulin like receptor A5; PSTPIP2: proline-serine-threonine phosphatase interacting protein 2; SOCS3: suppressor of cytokine signaling 3; RPS18: ribosomal protein S18.

**Supplementary Table 2** Summary of DEGs selected from each dataset using  $|\log_2$  Fold Change $|\geq 1.5$  and FDR  $< 0.05$  as cut-off criteria.

| <b>Dataset accession number</b> | <b>Upregulated gene in <i>Staphylococcus aureus</i>-induced sepsis</b> | <b>Downregulated gene in <i>Staphylococcus aureus</i>-induced sepsis</b> | <b>Upregulated gene in <i>Escherichia coli</i>-induced sepsis</b> | <b>Downregulated gene in <i>Escherichia coli</i>-induced sepsis</b> |
|---------------------------------|------------------------------------------------------------------------|--------------------------------------------------------------------------|-------------------------------------------------------------------|---------------------------------------------------------------------|
| GSE4607                         | 320                                                                    | 177                                                                      | 389                                                               | 108                                                                 |
| GSE25504                        | 132                                                                    | 34                                                                       | 204                                                               | 156                                                                 |
| GSE33341                        | 220                                                                    | 165                                                                      | 154                                                               | 141                                                                 |
| GSE65088                        | 335                                                                    | 116                                                                      | 367                                                               | 61                                                                  |

Note: FDR: false discovery rate.

**Supplementary Table 3** The common genes in any three datasets.

| Upregulated gene<br>in <i>Staphylococcus</i><br><i>aureus</i> -induced<br>sepsis | Downregulated<br>gene<br>in<br><i>Staphylococcus</i><br><i>aureus</i> -induced<br>sepsis | Upregulated<br>gene<br>in<br><i>Escherichia</i><br><i>coli</i> -induced<br>sepsis | Downregulated<br>gene<br>in<br><i>Escherichia</i><br><i>coli</i> -induced<br>sepsis |
|----------------------------------------------------------------------------------|------------------------------------------------------------------------------------------|-----------------------------------------------------------------------------------|-------------------------------------------------------------------------------------|
| ACSL1                                                                            | <b>CCR7</b>                                                                              | <b>ANXA3</b>                                                                      | ABLIM1                                                                              |
| <b>ANXA3</b>                                                                     | CD247                                                                                    | ARG1                                                                              | AUTS2                                                                               |
| B4GALT5                                                                          | <b>CD96</b>                                                                              | BASP1                                                                             | BCL11B                                                                              |
| <b>CEACAM1</b>                                                                   | <b>FCMR</b>                                                                              | CA4                                                                               | <b>CCR7</b>                                                                         |
| CST7                                                                             | ID3                                                                                      | CD177                                                                             | CD52                                                                                |
| DRAM1                                                                            | IL7R                                                                                     | <b>CEACAM1</b>                                                                    | <b>CD96</b>                                                                         |
| FCGR1B                                                                           | ITM2A                                                                                    | CLEC5A                                                                            | FAM102A                                                                             |
| <b>FFAR2</b>                                                                     | <b>LEF1</b>                                                                              | <b>FFAR2</b>                                                                      | <b>FCMR</b>                                                                         |
| <b>GK</b>                                                                        | <b>LRRN3</b>                                                                             | FLOT1                                                                             | <b>LEF1</b>                                                                         |
| <b>GYG1</b>                                                                      | LY9                                                                                      | FPR1                                                                              | <b>LRRN3</b>                                                                        |
| <b>HK3</b>                                                                       | <b>NELL2</b>                                                                             | <b>GK</b>                                                                         | <b>NELL2</b>                                                                        |
| <b>HP</b>                                                                        |                                                                                          | GPR84                                                                             | PASK                                                                                |
| <b>IL18R1</b>                                                                    |                                                                                          | <b>GYG1</b>                                                                       | RASGRP1                                                                             |
| IL1RN                                                                            |                                                                                          | <b>HK3</b>                                                                        |                                                                                     |
| LCN2                                                                             |                                                                                          | <b>HP</b>                                                                         |                                                                                     |
| <b>MMP9</b>                                                                      |                                                                                          | <b>IL18R1</b>                                                                     |                                                                                     |
| <b>OLFM4</b>                                                                     |                                                                                          | IL18RAP                                                                           |                                                                                     |
| <b>PFKFB3</b>                                                                    |                                                                                          | LILRA5                                                                            |                                                                                     |
| <b>PLSCR1</b>                                                                    |                                                                                          | LIMK2                                                                             |                                                                                     |
| <b>PSTPIP2</b>                                                                   |                                                                                          | MMP8                                                                              |                                                                                     |
| <b>RETN</b>                                                                      |                                                                                          | <b>MMP9</b>                                                                       |                                                                                     |
| S100A12                                                                          |                                                                                          | <b>OLFM4</b>                                                                      |                                                                                     |
| <b>SAMSN1</b>                                                                    |                                                                                          | ORM1                                                                              |                                                                                     |
| <b>SERPINB1</b>                                                                  |                                                                                          | PFKFB2                                                                            |                                                                                     |
| <b>SERPING1</b>                                                                  |                                                                                          | <b>PFKFB3</b>                                                                     |                                                                                     |
| SLC2A3                                                                           |                                                                                          | PGS1                                                                              |                                                                                     |
| <b>SOCS3</b>                                                                     |                                                                                          | <b>PLSCR1</b>                                                                     |                                                                                     |
| <b>SORT1</b>                                                                     |                                                                                          | <b>PSTPIP2</b>                                                                    |                                                                                     |
| <b>STOM</b>                                                                      |                                                                                          | <b>RETN</b>                                                                       |                                                                                     |
| <b>TNFAIP6</b>                                                                   |                                                                                          | <b>SAMSN1</b>                                                                     |                                                                                     |
| TXN                                                                              |                                                                                          | <b>SERPINB1</b>                                                                   |                                                                                     |

---

**SERPING1**

SMPDL3A

**SOCS3**

**SORT1**

**STOM**

TLR5

**TNFAIP6**

TNFSF10

UPP1

VPS9D1

---

Note: The bold font represents emerged in both *Staphylococcus aureus* and *Escherichia coli* groups.
